# Supplementary material for: Transformation of the Tanzania medical stores department through global fund support: an impact assessment study
Source: HighWire-hosted journal article supplement (doi:10.1136/bmjopen-2020-040276), 2020-11-01
Supplement: bmjopen-2020-040276supp003_data_supplement.pdf [file bmjopen-2020-040276supp003_data_supplement.pdf]

## Appendix 3: Financial Statement

## MEDICAL STORES DEPARTMENT

|                                  | 2018/2019<br>TZS '000 | 2017/2018<br>TZS '000 | 2016/2017<br>TZS '000 | 2015/2016<br>TZS '000 | 2014/2015<br>TZS '000 |
|----------------------------------|-----------------------|-----------------------|-----------------------|-----------------------|-----------------------|
| <b>Current assets</b>            |                       |                       |                       |                       |                       |
| Inventory                        | 55,050,380.00         | 51,280,917.05         | 26,860,594.25         | 44,168,056.00         | 64,175,017.00         |
| Government receivables           | 188,241,899.00        | 172,063,416.32        | 134,616,737.98        | 134,502,879.00        | 114,588,319.00        |
| Other receivables                | 1,838,459.00          | 1,062,060.23          | 1,159,002.68          | 1,043,762.00          | 1,330,655.00          |
| Advance payment to suppliers     | 34,518,122.00         | 14,754,371.35         | 8,881,059.56          | 3,696,997.00          | 6,725,015.00          |
| Prepayments                      | 8,466,668.00          | 6,836,444.03          | 3,125,671.30          | 1,144,947.00          | 1,725,762.00          |
| Cash and bank balances           | 53,416,384.00         | 40,275,168.70         | 92,993,733.64         | 24,903,994.00         | 73,716,103.00         |
| <b>Total Current assets</b>      | <b>341,531,912.00</b> | <b>286,272,377.68</b> | <b>267,636,799.41</b> | <b>209,460,635.00</b> | <b>262,260,871.00</b> |
| <b>Current liabilities</b>       |                       |                       |                       |                       |                       |
| Trade and other payable          | 86,185,390.00         | 62,205,669.57         | 72,285,094.72         | 78,569,655.00         | 80,133,712.00         |
| Deferred income grants           | 12,837.00             | 12,837.45             | 12,837.45             | 12,837.00             | 12,837.00             |
| Deferred customer credit         | 21,860,137.00         | 8,476,452.24          | 16,416,029.92         | 1,494,527.00          | 2,149,226.00          |
| Project accounts                 | 68,182,506.00         | 48,025,529.66         | 16,924,833.87         | 16,766,996.00         | 64,029,331.00         |
| Advance payment from customers   | 64,996,444.00         | 72,625,528.79         | 76,894,571.84         | 35,478,659.00         | 45,656,925.00         |
| <b>Total Current liabilities</b> | <b>164,206,491.98</b> | <b>191,346,017.71</b> | <b>182,533,367.79</b> | <b>132,322,674.00</b> | <b>191,982,031.00</b> |
| Working Capital                  | 100,294,598.00        | 94,926,359.97         | 85,103,431.62         | 77,137,961.00         | 70,278,840.00         |
| Sales                            | 235,352,238.00        | 251,389,264.61        | 172,413,431.99        | 126,440,444.00        | 160,533,362.00        |
| Cash and bank balances           | 53,416,384.00         | 40,275,168.70         | 92,993,733.64         | 24,903,994.00         | 73,716,103.00         |
| <b>Notes: USD 1 = TZS 2300</b>   |                       |                       |                       |                       |                       |
